# Supplementary material for: HVDFusion: An effective fusion framework based on Hilbert vibration decomposition for multi-focal and multi-sensor images
Source: Research Square preprint supplement (doi:10.21203/rs.3.rs-3772668/v1), 2024-03-07
Supplement: Supplementary file 1 [file 67d45211b2b3d0cf8691deff.docx]

**Tables**

**Table 1: The steps of the proposed fusion framework.**

| **Step 1:** | Take the registered source images. These may be multi-focus or multi-sensor images. |
| --- | --- |
| **Step 2:** | Arrange the pixels of these images in 1D format by row/column ordering. |
| **Step 3:** | Apply HVD to decompose the images into instantaneous energy components explained in Eq. 6. |
| **Step 4:** | Rearrange the components obtained from HVD to generate the instantaneous image amplitudes. |
| **Step 5:** | Subtract the instantaneous image amplitudes from the original images to generate instantaneous detailed image amplitudes. |
| **Step 6:** | Compute the weights of these instantaneous detailed image amplitudes obtained from the above step. For this, use unbiased estimates for horizontal as well as vertical strengths. |
| **Step 7:** | Obtain the fused image with the help of computed weights by using Eq. 14. |

**Table 2: Quantitative parameters for Fig. 8 (Red: Highest, Green: Second highest)**

| **Method** | **Evaluation Metric** | | | | | |
| --- | --- | --- | --- | --- | --- | --- |
|  | ***IE*** | ***Mean*** | ***SD*** | ***AG*** | ***SF*** | ***QUV/F*** |
| Averaging [13] | 7.6289 | 96.2015 | 56.5592 | 35.9559 | 0.0685 | 0.4651 |
| Weighted Average [13] | 7.6346 | 96.0442 | 57.0592 | 36.9035 | 0.0721 | 0.4935 |
| PCA [14] | 7.6293 | 95.9700 | 56.6486 | 36.1259 | 0.0690 | 0.4707 |
| RP [18] | 7.7408 | 96.3573 | 62.0680 | 68.0999 | **0.1362** | 0.7997 |
| DWT [19] | 7.7439 | 95.9758 | 61.4736 | **68.1405** | 0.1353 | 0.7684 |
| DTCWT [22] | 7.7289 | 95.9522 | 60.7886 | 66.5328 | 0.1341 | 0.7820 |
| Curvelet [23] | 7.7263 | 95.9560 | 60.5689 | 64.9865 | 0.1311 | 0.7525 |
| NSCT [25] | 7.7261 | 95.9545 | 61.1136 | 66.8472 | 0.1344 | 0.8014 |
| CNN [30] | 7.7335 | 96.5653 | **62.8063** | 64.6240 | 0.1291 | **0.8030** |
| NSST-MSMG [36] | 7.7297 | 96.1801 | 61.2732 | 66.2854 | 0.1335 | 0.0562 |
| XDOG [35] | **7.7751** | **106.8542** | 62.7991 | 65.5990 | 0.1325 | 0.7597 |
| Proposed | **7.7853** | **97.4565** | **63.1156** | **68.1889** | **0.1368** | **0.8093** |

**Table 3: Quantitative parameters for Fig. 9 (Red: Highest, Green: Second highest)**

| **Method** | **Evaluation Metric** | | | | | |
| --- | --- | --- | --- | --- | --- | --- |
|  | ***IE*** | ***Mean*** | ***SD*** | ***AG*** | ***SF*** | ***QUV/F*** |
| Averaging [13] | 7.4085 | 92.1967 | 63.9733 | 43.3541 | 0.0553 | 0.7657 |
| Weighted Average [13] | 7.4093 | 92.0913 | 64.0672 | 44.4238 | 0.0570 | 0.7789 |
| PCA [14] | 7.4072 | 92.0840 | 63.9719 | 43.4540 | 0.0555 | 0.7674 |
| RP [18] | 7.4217 | 92.2812 | 65.5814 | 55.7782 | 0.0770 | 0.8207 |
| DWT [19] | 7.3669 | 92.0756 | 65.0772 | 49.8019 | 0.0609 | 0.6667 |
| DTCWT [22] | 7.4190 | 92.0814 | 65.6144 | 56.3856 | 0.0774 | 0.8244 |
| Curvelet [23] | 7.4336 | 92.0750 | 65.6164 | 56.4134 | 0.0774 | 0.8185 |
| NSCT [25] | 7.4189 | 92.0868 | 65.6439 | 56.3886 | 0.0775 | 0.8249 |
| CNN [30] | 7.4206 | 92.2734 | 65.7740 | 56.4047 | 0.0773 | 0.8252 |
| NSST-MSMG [36] | 7.4229 | 92.0385 | 65.6445 | 56.3621 | 0.0774 | 0.8234 |
| XDOG [35] | **7.5008** | **96.5269** | **66.3040** | **64.6842** | **0.0870** | **0.7580** |
| Proposed | **7.5183** | **93.2061** | **65.9458** | **57.1743** | **0.0795** | **0.8259** |

**Table 4: Quantitative parameters for Fig. 12 (Red: Highest, Green: Second highest)**

| **Method** | **Evaluation Metric** | | | | | |
| --- | --- | --- | --- | --- | --- | --- |
|  | ***IE*** | ***Mean*** | ***SD*** | ***AG*** | ***SF*** | ***QUV/F*** |
| Averaging [13] | 4.8281 | 43.5693 | 51.5752 | 23.0098 | 0.0474 | 0.4083 |
| Weighted Average [13] | 4.8515 | 42.6289 | 51.0481 | 24.7794 | 0.0506 | 0.4962 |
| PCA [14] | 4.6042 | 43.4794 | 51.8583 | 22.1919 | 0.0467 | 0.3766 |
| RP [18] | 5.2803 | 44.1342 | **59.3152** | **44.7031** | 0.0723 | 0.5858 |
| DWT [19] | 5.2709 | 43.7261 | 55.1689 | **41.9101** | 0.0729 | 0.4829 |
| DTCWT [22] | 5.1877 | 43.6004 | 53.6384 | 37.0769 | 0.0750 | 0.5376 |
| Curvelet [23] | **5.2856** | 43.8911 | 53.6758 | 38.3937 | 0.0758 | 0.5065 |
| NSCT [25] | 5.0999 | 43.5725 | 54.4340 | 37.9061 | 0.0779 | 0.6184 |
| CNN [30] | 4.7615 | 42.0568 | 53.8908 | 35.1489 | 0.0737 | **0.6665** |
| NSST-MSMG [36] | 5.1254 | 44.1255 | 55.7047 | 36.4768 | 0.0748 | 0.5674 |
| XDOG [35] | 5.2222 | **51.1130** | **62.1140** | 38.8365 | **0.0800** | 0.6099 |
| Proposed | **5.2992** | **44.2065** | 57.8472 | 39.1302 | **0.0794** | **0.6189** |

**Table 5: Quantitative parameters for Fig. 13 (Red: Highest, Green: Second highest)**

| **Method** | **Evaluation Metric** | | | | | |
| --- | --- | --- | --- | --- | --- | --- |
|  | ***IE*** | ***Mean*** | ***SD*** | ***AG*** | ***SF*** | ***QUV/F*** |
| Averaging [13] | 6.0967 | 86.7308 | 18.5789 | 23.2792 | 0.0274 | 0.2848 |
| Weighted Average [13] | 5.9473 | 86.3380 | 16.0260 | 22.0139 | 0.0264 | 0.2539 |
| PCA [14] | **7.5561** | 87.2586 | **57.9072** | **53.6803** | **0.0620** | 0.5013 |
| RP [18] | 6.5478 | 91.5685 | 23.9236 | 39.6208 | 0.0420 | 0.4039 |
| DWT [19] | 6.6248 | 86.4822 | 26.4102 | 34.0644 | 0.0325 | 0.5044 |
| DTCWT [22] | 6.4148 | 86.4999 | 22.4959 | 36.6253 | 0.0416 | 0.3090 |
| Curvelet [23] | 6.4714 | 86.4804 | 23.2817 | 38.8077 | 0.0455 | 0.4187 |
| NSCT [25] | 6.4546 | 86.4814 | 23.0204 | 39.1627 | 0.0453 | 0.4877 |
| CNN [30] | **6.9655** | **99.3185** | **35.0830** | 35.2066 | 0.0425 | **0.5622** |
| NSST-MSMG [36] | 6.6690 | 91.1477 | 29.9018 | 38.6472 | 0.0453 | **0.5055** |
| XDOG [35] | 6.7186 | **106.8616** | 31.2687 | 39.8060 | 0.0472 | 0.4426 |
| Proposed | 6.8730 | 93.2465 | 30.5295 | **39.9210** | **0.0499** | 0.4943 |

**Table 6: Running time period of different algorithms (Blue: Lowest, Red: Highest, Bold: Proposed)**

| **Method** | **Running time (in seconds)** | | |
| --- | --- | --- | --- |
|  | ***256 x 256 (multi-focus and medical images)*** | ***480 x 360 (multi-focus "animal" image)*** | ***575 x 475 (VI-IR image)*** |
| Averaging [13] | 0.435274 | 0.440491 | 0.494111 |
| Weighted Average [13] | 0.423896 | 0.431885 | 0.445582 |
| PCA [14] | 0.303212 | 0.319286 | 0.363320 |
| RP [18] | **0.089204** | **0.104675** | **0.158355** |
| DWT [19] | 0.386657 | 0.428988 | 0.452789 |
| DTCWT [22] | 0.239811 | 0.283180 | 0.327943 |
| Curvelet [23] | 0.866891 | 0.914574 | 1.057221 |
| NSCT [25] | 1.049832 | 2.027896 | 3.132519 |
| CNN [30] | **27.784986** | **63.821401** | **100.250228** |
| NSST-MSMG [36] | 10.195036 | 62.029998 | 96.103377 |
| XDOG [35] | 0.792172 | 1.868945 | 2.394645 |
| Proposed | **3.317172** | **7.007321** | **10.133991** |
